# Supplementary material
Source: publisher site journal article supplement (https://www.dovepress.com/get_supplementary_file.php?f=335425.docx)

| Gene | Sequence |
| --- | --- |
| GAPDH |  |
| F | 5′- GGTGGTCTCCTCTGACTTCAACA -3′ |
| R | 5′- GTTGCTGTAGCCAAATTCGTTGT-3′ |
| CYP2C8 |  |
| F | 5′- CATCTGGCTGCCGATCTGCTATC -3′ |
| R | 5′- AGTGACCTGAACAACTCTCCTTAATGG -3′ |
| TP53 |  |
| F | 5′‐GAGGATTCACAGTCGGATA‐3′ |
| R | 5′‐ATCATCTGGAGGAAGAAGTT‐3′ |

Table S1. The forward and reverse primer sequences of GAPDH, CYP2C8

and TP53.

Abbreviation: F, forward; R reverse.

Figure S1. Construction of stable CYP2C8-over-expression HepG2 and HCCM. a, Expression of CYP2C8 in several HCC cell lines and normal liver cell lines. b, Achromatic and fluorescent image of HepG2-CYP2C8 cells and HepG2-GFP cells. c, Achromatic and fluorescent image of HCCM-CYP2C8 cells and HCCM-GFP cells. d, Expression level of CYP2C8 in HepG2-CYP2C8, HepG2-GFP and HepG2-Mock cells assessed by qRT-PCR. e, Expression level of CYP2C8 in HCCM -CYP2C8, HCCM -GFP and HCCM -Mock cells assessed by qRT-PCR. f, Expression level of CYP2C8 in HepG2-CYP2C8, HepG2-GFP and HepG2-Mock cells assessed by WB assays. g, Expression level of CYP2C8 in HCCM -CYP2C8, HCCM -GFP and HCCM -Mock cells assessed by WB assays. h-i, CYP2C8 over-expression had no significant influence on TP53 expression in HepG2 cells. Data were presented as the mean ± SD, * P<0.05, ** P<0.01, *** P<0.001, **** P<0.0001.
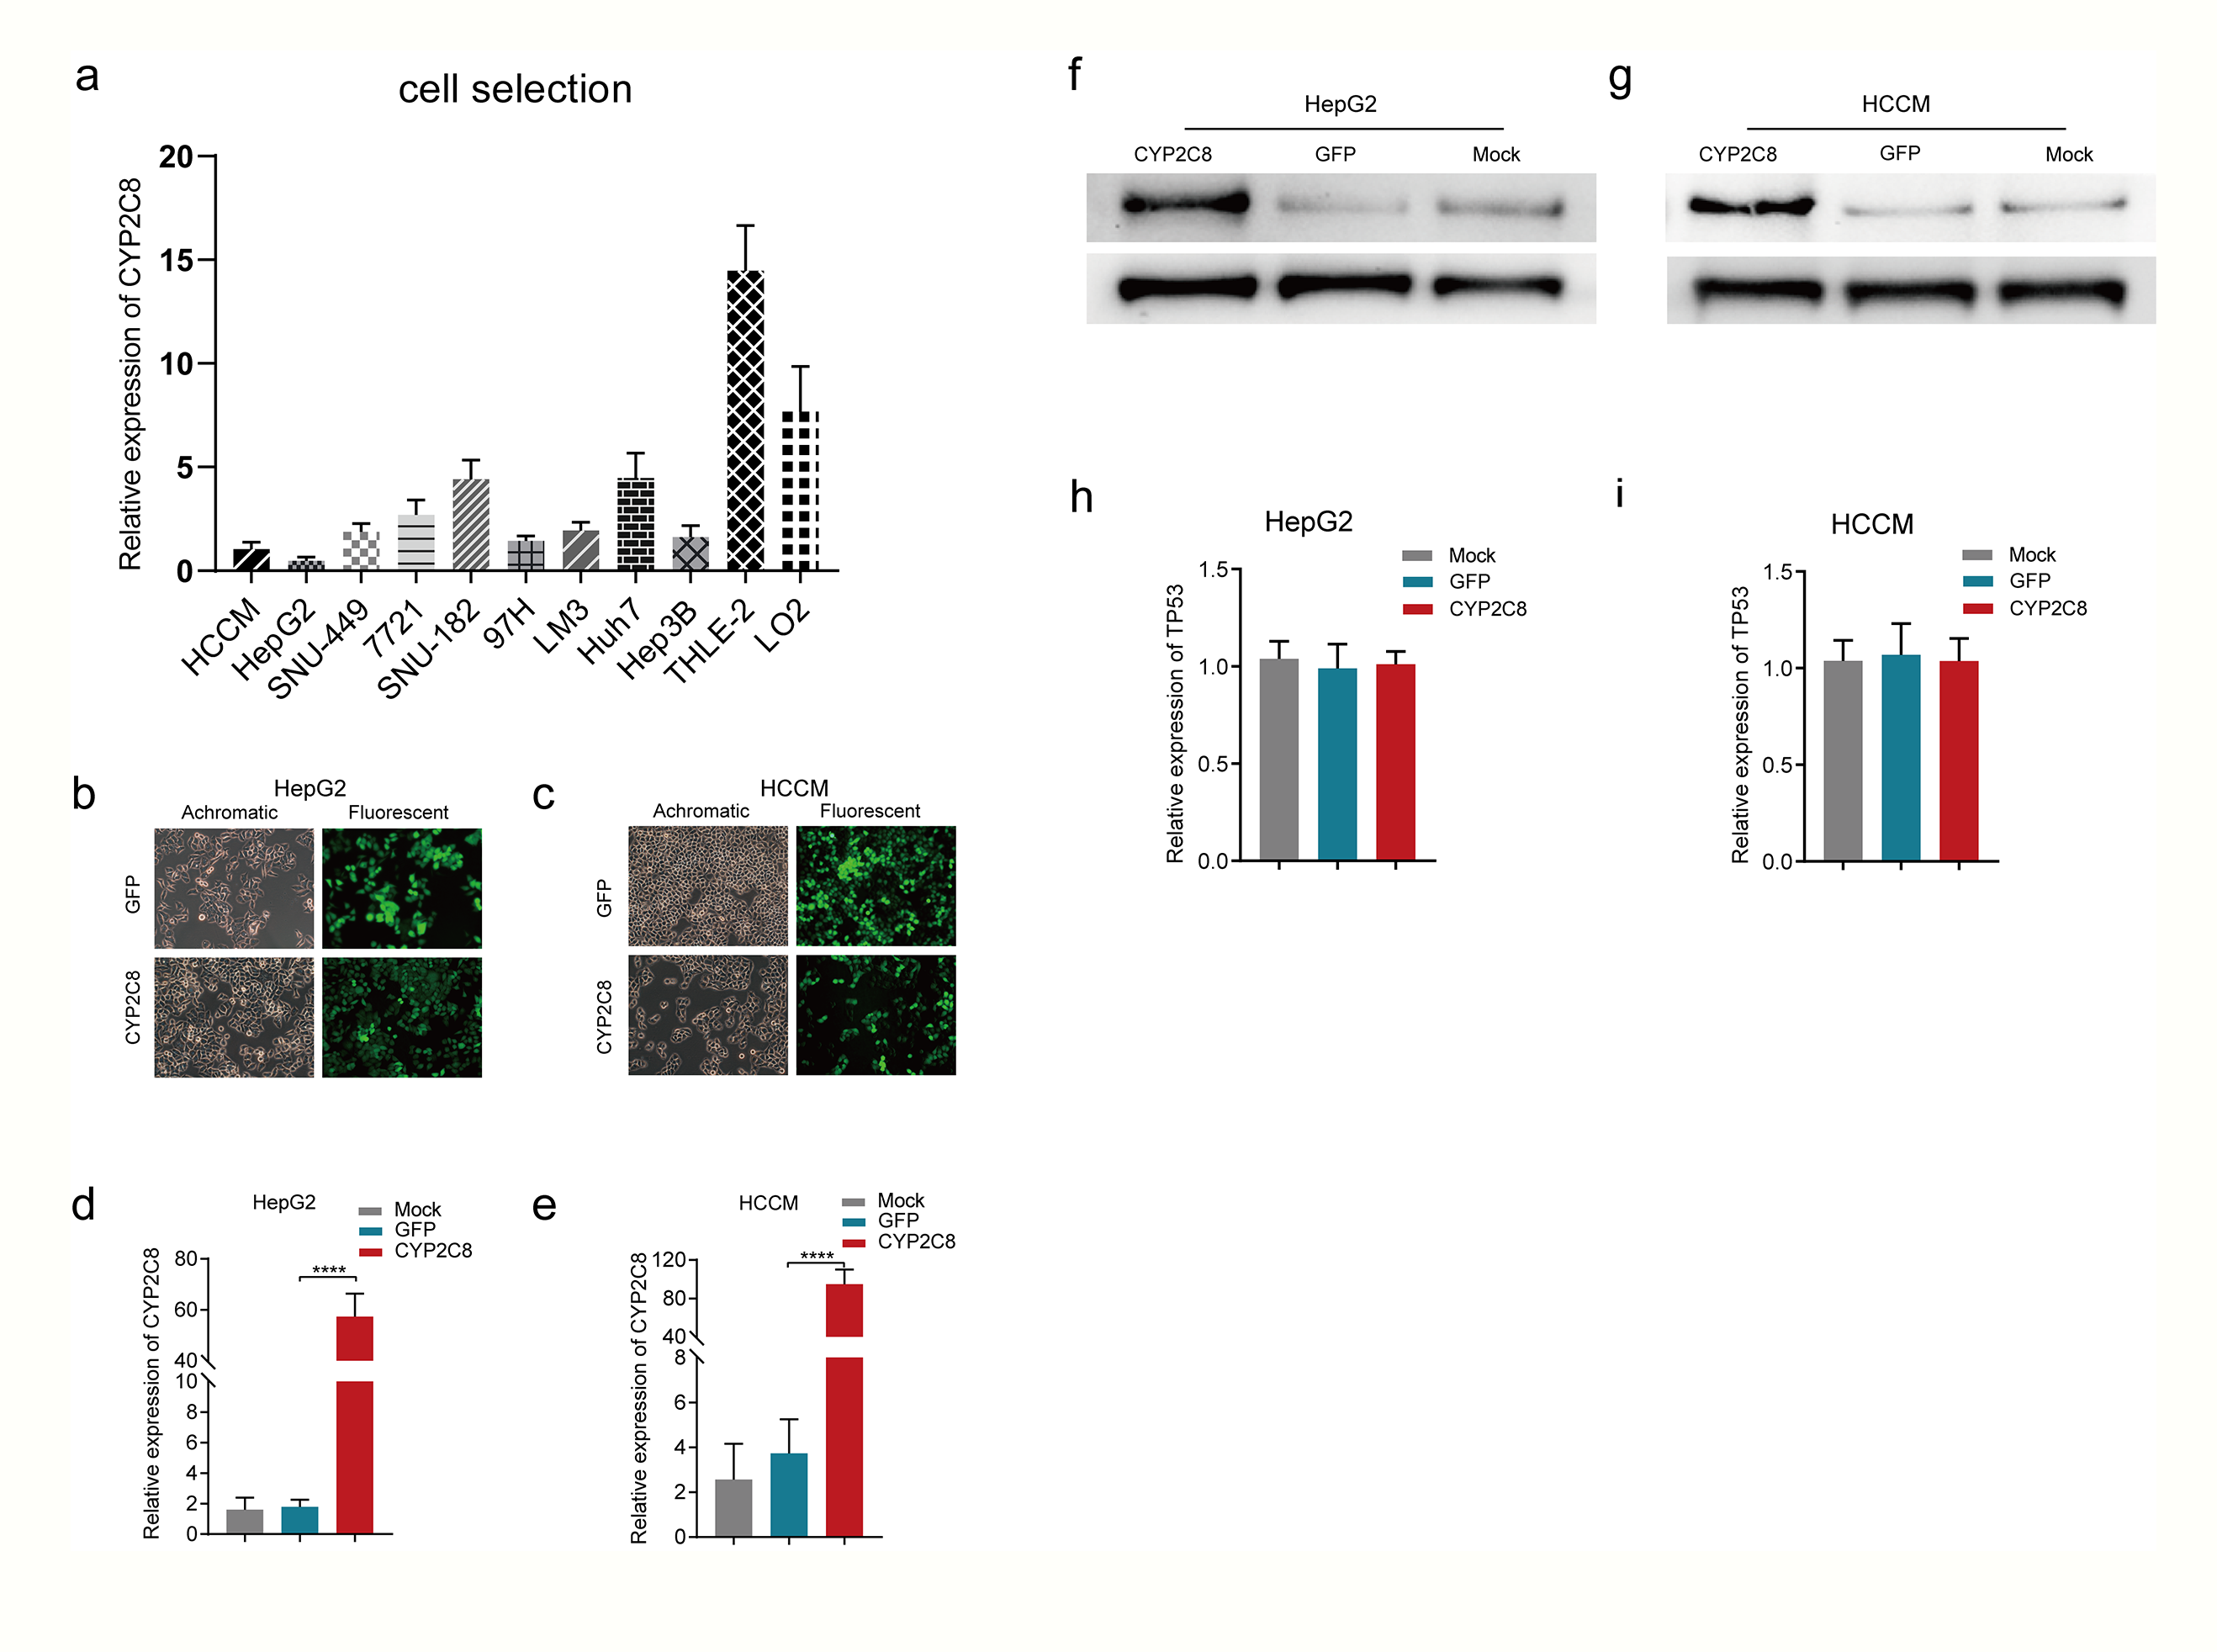


Figure S2. CYP2C8 over-expression enhanced the therapeutic effect of sorafenib in migration and invasion. a, CYP2C8 over-expression enhanced the migration inhibition of sorafenib in HepG2 cells. b, CYP2C8 over-expression enhanced the migration inhibition of sorafenib in HCCM cells. c, CYP2C8 over-expression enhanced the invasion inhibition of sorafenib in HepG2 cells. d, CYP2C8 over-expression enhanced the invasion inhibition of sorafenib in HCCM cells. e-f, The effect of CYP2C8 over-expression on proliferation of HepG2 (e) and HCCM (f) cells was offset by 740YP assessed by CCK8 assays. g-h, The effect of CYP2C8 over-expression on colony formation of HepG2 (g) and HCCM (h) cells was offset by 740YP assessed by colony formation assays. Data were presented as the mean ± SD, * P<0.05, ** P<0.01, *** P<0.001, **** P<0.0001.


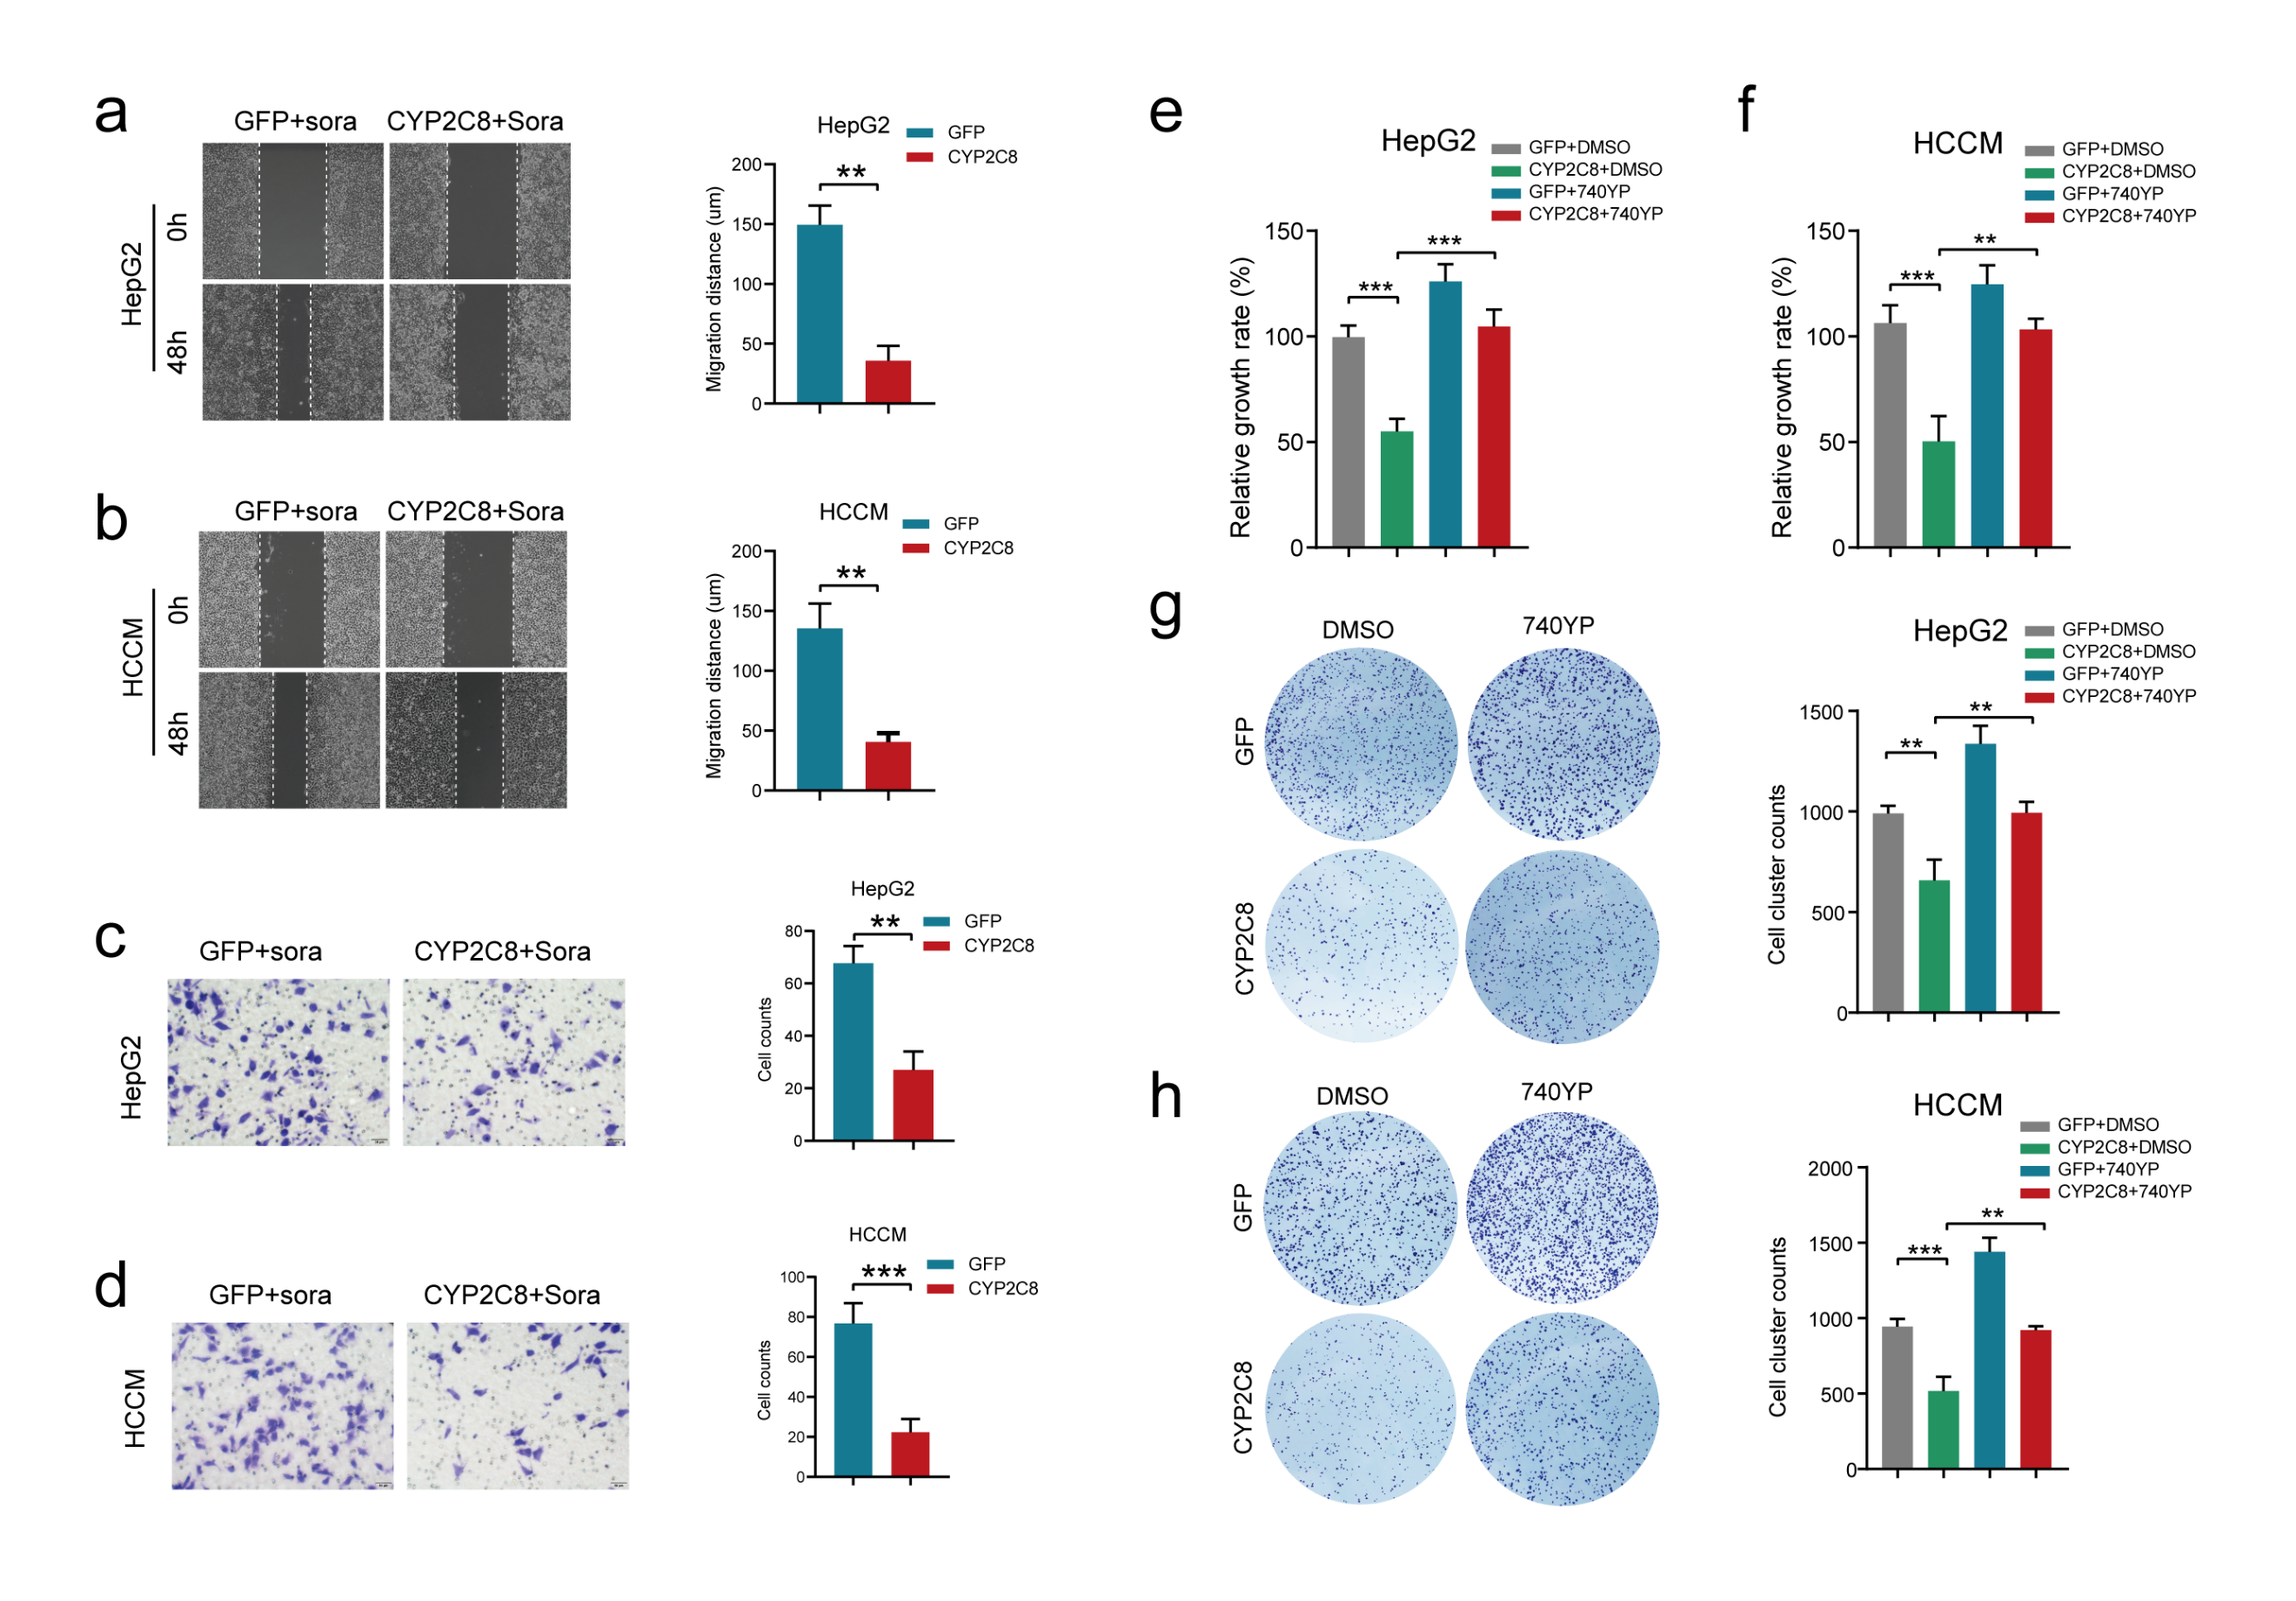


Figure S3. Graphical abstract


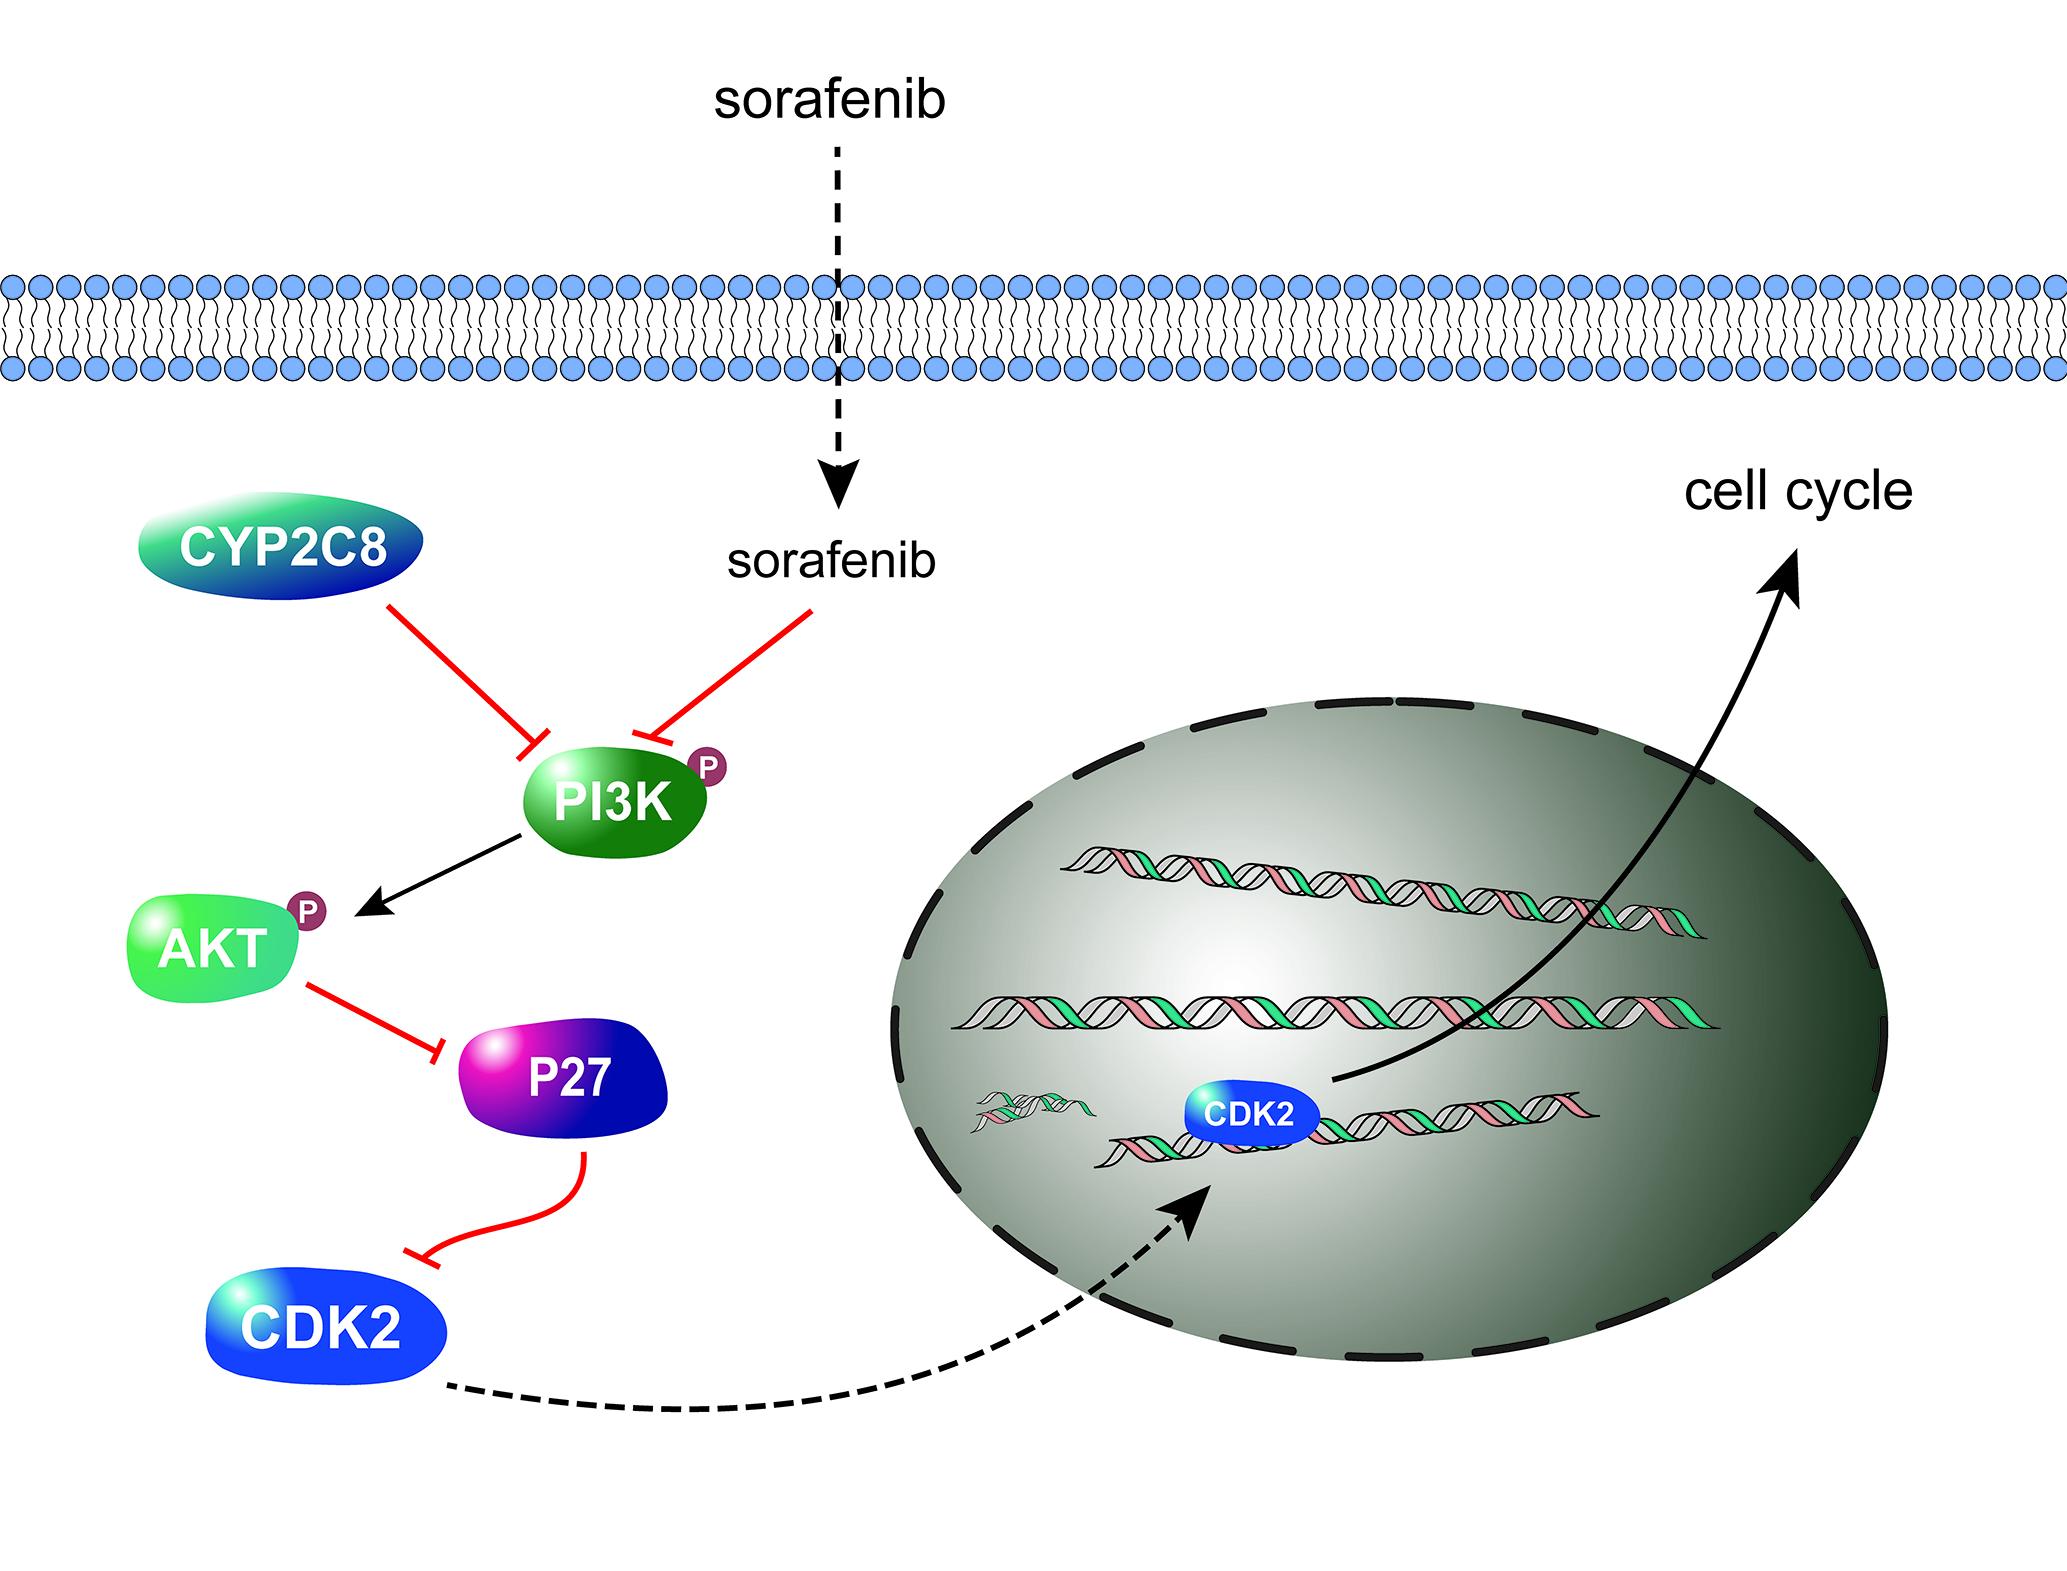

Supplement: Supplementary file 1 [file get_supplementary_file.php]
